# Supplementary material for: Short-Form Thymic Stromal Lymphopoietin (sfTSLP) Is the Predominant Isoform Expressed by Gynaecologic Cancers and Promotes Tumour Growth
Source: PubMed Central journal article supplement (PMC7956741; doi:10.3390/cancers13050980), 2021-02-26
Supplement: cancers-13-00980-s001.pdf [file cancers-13-00980-s001.pdf]

Figure S1

**Homo sapiens thymic stromal lymphopoietin (TSLP), transcript variant 1, mRNA**  
NCBI Reference Sequence: NM\_033035.4

Keys:

[Coding sequence];  
Primer binding sites;  
PCR target region (TSLPv1) flanked by primers designed by us;  
PCR target region (CDS of TSLPv1) flanked by primers designed by us;  
PCR target region (lfTSLP) flanked by primers designed by Fornasa et al.(29)  
and Biancheri et al.(30);  
{Binding site of Basescope probe};  
**Sequence that overlapped with Homo sapiens thymic stromal lymphopoietin (TSLP), transcript variant 2, mRNA (NM\_138551.4)**

```
1 gcagccagaa agctctggag catcagggag actccaactt aaggcaacag catgggtgaa
61 taaggg{cttc ctgtggactg gcaatgagag gcaaaacctg gtgcttgagc actggccctc
121 aaggcaggcc ttacagatct cttacactcg} tggtggaag agtttagtgt gaaactgggg
181 tgaattggg tgtccacgt[a tgttcccttt tgccttacta tatggtctgt cagtttcttt
241 caggaaaatc ttcattctac aactttagag gctgggtgta acttacgact tactaactg
301 tgactttgag aagattaaag cagcctatct cagtactatt tctaaagacc tgattacata
361 tatgagtgagg accaaaagta ccgagttcaa caacaccgtc tcttgtagca atcggccaca
421 ttgccttact gaaatccaga gcctaacctt caatcccacc gccggctgcg cgtcgcctcg
481 caaagaaatg ttcgcatga aaactaaggc tgccttagct atctggtgcc caggctattc
541 ggaactcag ataaatgcta ctcaggcaat gaagaagagg agaaaaagga aagtcacaac
601 caataaatgt ctggaacaag tgcacaatt acaaggattg tggcgtcgct tcaatcgacc
661 tttactgaaa caacagtaa]a ccatctttat tatggtcata tttcacagca ccaaaataaa
721 tcactctttat taagtagatg aaacattaac tctaactgtg acaagaaga ccaaaatag
781 ttatctttta attacagaag agtttcttaa cttacttttg taagttttta ttgtgtaagt
841 ttataatgca ggggaagtac tactcctcaa atgttgaggg aagcttccat aacattgatg
901 actggcttca tggcagtaat tctcggctgt agttgcataa gcattgctca agaggaaaat
961 ccaaaagtgc agcaggagaa ctcttttccc tgaaaaagga aaaatattga actcaatgat
1021 agcacctaaa cttacattta aaagacagac attccttcta catgtaatga cacttcttgt
1081 gttaaaactaa aaatttaca gagaagaaa gaaagcaaa tggggtttca caaatagttg
1141 taaataatagt gaagcaattt gaaataattt tcaagcaaa tatttgtaa gtattctaag
1201 ccaagttta aatattatct aacagacaag agtggatat acaagtagat cctgagaagt
1261 acctttgtta cagctactat aaatatacat ataaattata gaatctact taatttattt
1321 tgtgaacact tttgaaaatg tacatgttcc tttgtaattg aactatata tttcttaata
1381 aaataattct caaatttgtt tcttatgaat catctctcaa atctagttag acaatttgca
1441 cacatacttt tctaagggac attatcttcc ttcaggtttt tacctccact catccttaga
1501 gccactgac tgcctcccct tatacctggt gccctgcct ataggagaga atatttgag
1561 ataggcagct tcaggatgca ttgcaatcat ccttttctta aattatgtca ctagtctttt
1621 attttttccc ctcttgaact ttctcacac ctggaagaaa caaagtagga aaaagtgaac
1681 aggggatgtc aaatcgattc ttgaattccc gctgcaagct agagccgag gccacctctc
1741 actcaatttc cactcagaac cctataaaca ccagtgaggaa gggcaaccca ctgcacgtgg
1801 gaatgcactg atttttccta ggagtagaca tgttcctcta attactccct gagggtagt
1861 tggggtttaa ccatgacaga agtgggaag ttcaatgtcc ttaaatccat ctacttgcc
1921 aacaggtaag aggaagctta cattacatgt ccagtccaca tttaaagagc acttactgtg
1981 gaacaagcct tcagccaaac aatggggata gaaaagtagg taagactcag cctttgtcca
2041 gagaagctca gggtagact gaataggcag tttcttttgt cctgaggaaa atcaggacat
2101 gcctgctttc taaaaatctt cctctgaaga cctgacccaa gctcttaaat gctattgtaa
2161 gagaaatttc tttgtctatt aactccattt tagtagggat tcaactgacta gattttactg
2221 aacatgaaa ataaatacac ataatttttc acaaaatttt gggccaatt cccataaag
2281 aattgaggat tagggagaaa ggagacaact caaagtcac ccatatagtg cagtttcttt
2341 gaatcttctg ctttatcttt aaaaatttgt ataatttata tattttattc tatgtgttcc
2401 atagatatct taatgtaaaa ttagtcattt aaattacact gtcaattaaa agtaatgggc
2461 aagagattgc atcactataa ttagtaaga acgttcccaa atgttgtaac aatgtggatc
2521 atacatctct ggttttttaa atgtattgag gctttcttgg tggactagta tagtatacgg
2581 tcagttatgt caatgtttca tggtaataa aaaggaagtt gcaaatgt
```

1 gcagccagaa agctctggag catcagggag actccaactt aaggcaacag catgggtgaa  
61 taaggg{cttc ctgtggactg gcaatgagag gcaaaacctg gtgcttgagc actggcccct  
121 aaggcaggcc ttacagatct cttacactcg} tggtggaag agtttagtgt gaaactgggg  
181 tggaaattggg tgtccacgt[a tgttccctt tgcttacta tatgttctgt cagtttctt  
241 caggaaaatc ttcattttac aacttgtagg gctgggtgta acttaogact tcaactaactg  
301 tgactttgag aagattaaag cagcctatct cagtactatt tctaaagacc tgattacata  
361 tatgagtgagg accaaaagta ccgagttcaa caacaccgtc tcttgtagca atcggccaca  
421 ttgccttact gaaatccaga gcctaacctt caatcccacc gccggctgcg cgtcgtcgc  
481 caaagaatg ttcgcatga aaactaaggc tgcttagct atctggtgcc caggctattc  
541 gaaactcag ataaatgcta ctcaggcaat gaagaagagg agaaaagga aagtcacaac  
601 caataaatgt ctggaacaag tgtcacaatt acaaggattg tggcgtcgt tcaatcgacc  
661 ttactgaaa caacagtaa|a ccatctttat tatggtcata tttcacagca ccaaaataaa  
721 tcatctttat taagtagatg aaacattaac tctaactgtg acaagaaga ccacaaatag  
781 ttatctttta attacagaag agtttcttaa cttacttttg taagttttta ttgtgtaagt  
841 ttataatgca ggggaagtac tactcctcaa atggtgaggg aagcttccat aacattgatg  
901 actggcttca tggcagtaat tctcggctgt agttgcataa gcattgctca agaggaaat  
961 ccaaaagtgc agcaggagaa ctcttttccc tgaaaaagga aaaatattga actcaatgat  
1021 agcacctaaa cttacattta aaagacagac attccttcta catgtaatga cacttcttgt  
1081 gttaaactaa aaatttaca gagaaagaa tgaaagcaaa tggggtttca caaatagttg  
1141 taaatatagt gaagcaatth gaataatth tcaagcaaa tattgtgaaa gtattctaag  
1201 ccaagtttth aatattatct aacagacaag agtgggtatat acaagtagat cctgagaagt  
1261 acctttgtta cagctactat aaatatacat ataaattata gaatctactt taatttattt  
1321 tgtgaacact ttgaaaatg tacatgttcc tttgtaattg aactatata tttcttaata  
1381 aaataattct caaatttgtt tcttatgaat catctctcaa atctagttag acaatttgca  
1441 cacatacttt tctaagggac attatcttcc ttcaggtttt tacctccact catccttaga  
1501 gccactgac tgctcccctt tatacctggt gccctgcct ataggagaga atatttgag  
1561 ataggcagct tcaggatgca ttgcaatcat ccttttctta aattatgtca ctagtctttt  
1621 attttttccc ctcttgaact ttcctcacac ctggaagaaa caaagtagga aaaagtgaac  
1681 aggggatgtc aaatcgattc ttgaattccc gctgcaagct agagccgcag gcaccctctc  
1741 actcaatttc cactcagaac cctataaaca ccagtgggaa gggcaaccca ctgcacgtgg  
1801 gaatgcaactg atttttccta ggagtagaca tgttccctta attactccct gagggtagt  
1861 tggggctaaa ccatgacaga agtggggaag ttcaatgtcc ttaaattccat cttacttgcc  
1921 aacaggtaag aggaagctta cattacatgt ccagtccaca tttaaagagc acttactgtg  
1981 gaacaagcct tcagccaaac aatggggata gaaaagtagg taagactcag ctttgtcca  
2041 gagaagctca gggtagact gaataggcag tttcttttgt cctgaggaaa atcaggacat  
2101 gctgctttc taaaaatctt cctctgaaga cctgacccaa gctcttaaat gctattgtaa  
2161 gagaaatttc tttgtctatt aactccattt tagtagggat tcaactgacta gatthtactg  
2221 aactatgaaa ataaatacac ataatttttc acaaaatttt gggccaatt cccctaaaag  
2281 aattgaggat tagggagaaa ggagacaact caaagtcac cattaagtg cagtttcttt  
2341 gaatcttctg ctttatcttt aaaaatttgt ataatttata tattttattc tatgtgttcc  
2401 atagatatct taatgtaaaa ttagtcattt aaattacact gtcaattaaa agtaatgggc  
2461 aagagattgc atcactactaa ttagtaaga acgttcccaa atggtgtaac aatgtggatc  
2521 atacatctct ggttttttaa atgtattgag gctttcttgg tggactagta tagtatacgg  
2581 tcagttatgt caatgtttca tggtaataa aaaggaagtt gcaattgt



Figure S2

**Homo sapiens thymic stromal lymphopoietin (TSLP), transcript variant 2, mRNA**  
NCBI Reference Sequence: NM\_138551.4

Keys:

[Coding sequence];  
Primer binding sites;  
PCR target region (TSLPv2) flanked by primers designed by us;  
PCR target region (CDS of TSLPv2) flanked by primers designed by us;  
PCR target region (sfTSLP) flanked by primers designed by Fornasa et al.(29)  
and Biancheri et al.(30);  
{Binding site of Basescope probe};  
**Sequence that overlapped with Homo sapiens thymic stromal lymphopoietin (TSLP), transcript variant 1, mRNA (NM\_033035.4)**

```
1 accctcgcca cgcccctgct cccccgcggt t{ggttcttcc ttgctctact caaccctgac
61 ctcttctctc tgactctoga cttgtgttcc ccgctctctc ctgaccttcc tcccctcccc
121 tttcaactcaa ttctcaccaa cttttctct ctctgggtgtt ttctcc}tttt ctgtaaac
181 ttgcccgccta tgagcagcca cattgcctta ctgaaatcca gagcctaacc ttcaatccca
241 ccgcccggctg cgcgtcgcctc gccaaagaa[a tgttcgccat gaaaactaag gctgccttag
301 ctatctgggtg cccaggctat tcggaaactc agataaatgc tactcaggca atgaagaaga
361 ggagaaaaag gaaagtcaca accaataaat gtctggaaca agtgtcacaa ttacaaggat
421 tgtggcgcgc cttcaatcga cttttactga aacaacagta a]accatcttt attatgggtca
481 tatttcacag caccaaaata aatcatcttt attaagtaga tgaacatta actctaactg
541 tgacaaagaa gaccacaaat agttatcttt taattacaga agagtttctt aacttacttt
601 tgtaagtttt tattgtgtaa gtttataatg caggggaagt actactctc aaatggtgag
661 ggaagcttcc ataacattga tgactggctt catggcagta attctcggct gtagttgcat
721 aagcattgct caagaggaaa atccaaaagt gcagcaggag aactcttttc cctgaaaaag
781 gaaaaatatt gaactcaatg atagcaccta aacttacatt taaaagacag acattccttc
841 tacatgtaat gacattctt gtgttaaact aaaaatttac aagagaagaa agtgaaagca
901 aatgggggttt cacaaatagt tgtaaatata gtgaagcaat ttgaaataat ttcaagcaa
961 agtattgtga aagtattcta agccaagttt taaatattat ctaacagaca agagtgggat
1021 atacaagtag atcctgagaa gtacctttgt tacagctact ataaatatac atataaatta
1081 tagaatctac ttaattttat tttgtgaaca cttttgaaaa tgtacatggt cttttgtaat
1141 tgacactata tatttcttaa taaaataatt ctcaaattg tttcttatga atcatctctc
1201 aaatctagtt agacaatttg cacacatact ttctaaggg acattatctt cttcagggtt
1261 tttacctcca ctcatcctta gagccactg actgctcccc tttatacctg ttggccctgc
1321 ctataggaga gaatatttg agataggcag cttcaggatg cattgcaatc atccttttct
1381 taaattatgt cactagtctt ttattttttc cctcttgaa ctttcctcac acctggaaga
1441 acaaaagtag gaaaaagtga acaggggatg tcaaatcgat tcttgaattc ccgctgcaag
1501 ctagagccgc aggcaccctc tcactaaatt tccactcaga accctataaa caccagtggy
1561 aagggcaacc cactgcacgt gggaatgcac tgattttcc taggagtaga catgttcctc
1621 taattactcc ctgaggggta gttggggcta aaccatgaca gaagtgggga agttcaatgt
1681 ccttaaatcc atcttacttg ccaacaggta agaggaagct tacattacat gtccagtcca
1741 catttaaaga gcacttactg tggacaagc cttcagccaa acaatgggga tagaaaagta
1801 ggtaagactc agcctttgct cagagaagct cagggtatag ctgaataggc agtttctttt
1861 gtccctgagga aaatcaggac atgcctgctt tctaaaaatc ttctctgaa gacctgaccc
1921 aagctcttaa atgctattgt aagagaaatt tctttgtcta ttaactccat tttagtaggy
1981 attcactgac tagattttac tgaactatga aaataaatac acataatfff tcacaaaatt
2041 ttgggcccga tcccctaaa agaattgagg attagggaga aaggagacaa ctcaaagtca
2101 tcccattaag tgcagtttct ttgaatcttc tgccttatct ttaaaaaatt gtataattta
2161 tatattttat tctatgtggt ccatagatat cttaatgtaa aattagtcatt taaattaca
2221 ctgtcaatta aaagtaatgg gcaagagatt gcatcact aatttagtaa gaacgttccc
2281 aatgtttgta acaatgtgga tcatacatct ctgggttttt aatgtattg aggctttctt
2341 ggtggactag tatagtatac ggtcagttat gtcaatgttt catggtcaat aaaaggaag
2401 ttgcaaatgg t
```

1 accctcgcca cgccctgct cccccgggt t{ggttcttc ttgctctact caaccctgac  
61 ctcttctctc tgactctcga cttgtgtcc cegctoctcc ctgaccttcc tcccctcccc  
121 tttcactcaa ttctcaccaa ctctttctct ctctgggttt ttctcc}tttt ctgtaaaact  
181 ttgccgcta tgagcagcca cattgcctta ctgaaatcca gagcctaacc ttcaatccca  
241 **ccgccggctg cgcgtcgctc gccaaaqaa[a tgttcqccat gaaaactaag gctgccttag**  
301 **ctatctgggtg cccaggctat tcggaaactc agataaatgc tactcaggca atgaagaaga**  
361 **ggagaaaaag gaaagtcaca accaataaat gtctggaaca agtgcacaa ttacaaggat**  
421 **tgtggcgctg cttcaatcga cctttactga aacaacagta a|accatcttt attatggcca**  
481 **tatttcacag caccaaaata aatcatcttt attaagtaga tgaacatta actctaactg**  
541 **tgacaaagaa gaccacaaat agttatcttt taattacaga agagtttctt aacttacttt**  
601 **tgtaagtttt tattgtgtaa gttataatg caggggaagt actactcctc aaatggtgag**  
661 **ggaagcttcc ataacattga tgactggctt catggcagta attctcggct gtagttgcat**  
721 **aagcattgct caagaggaaa atccaaaagt gcagcaggag aactcttttc cctgaaaaag**  
781 **gaaaaatatt gaactcaatg atagcaccta aacttacatt taaaagacag acattccttc**  
841 **tacatgtaat gacacttctt gtgttaaact aaaaatttac aagagaagaa agtgaaagca**  
901 **aatggggttt cacaaatagt tgtaaatata gtgaagcaat ttgaaataat ttcaagcaa**  
961 **agtattgtga aagtattcta agccaagttt taaatattat ctaacagaca agagtggat**  
1021 **atacaagtag atcctgagaa gtacctttgt tacagctact ataaatatac atataaatta**  
1081 **tagaatctac ttaattttat tttgtgaaca cttttgaaaa tgtacatggt cctttgtaat**  
1141 **tgacactata tttttcttaa taaaataatt ctcaaatttg tttcttatga atcatctctc**  
1201 **aaatctagtt agacaatttg cacacatact tttctaaggg acattatctt ccttcaggtt**  
1261 **tttacctcca ctcatcctta gagcccactg actgctcccc ttataacctg ttggccctgc**  
1321 **ctataggaga gaatatttgg agataggcag cttcaggatg cattgcaatc atccttttct**  
1381 **taaattatgt cactagtctt ttattttttc ccctcttgaa ctttcctcac acctggaaga**  
1441 **aacaaagtag gaaaaagtga acaggggatg tcaaatcgat tcttgaattc ccgctgcaag**  
1501 **ctagagccgc aggcaccctc tcaactcaat tccactcaga accctataaa caccagtggg**  
1561 **aagggaacc cactgcacgt gggaatgcac tgatttttcc taggagtaga catgttcctc**  
1621 **taattactcc ctgaggggta gttggggcta aaccatgaca gaagtgggga agttcaatgt**  
1681 **ccttaaatcc atcttacttg ccaacaggta agaggaagct tacattacat gtccagtcca**  
1741 **catttaaaga gcacttactg tggacaagc cttcagccaa acaatgggga tagaaaagta**  
1801 **ggtaaagactc agcctttgtc cagagaagct caggggatag ctgaaataggc agtttctttt**  
1861 **gtcctgagga aaatcaggac atgcctgctt tctaaaaatc ttcctctgaa gacctgacct**  
1921 **aagctcttaa atgctattgt aagagaaatt tctttgtcta ttaactccat ttagtaggg**  
1981 **attcactgac tagattttac tgaactatga aaataaatac acataatfff tcacaaaatt**  
2041 **ttgggcccac ttcccctaaa agaattgagg attagggaga aaggagacaa ctcaaagtca**  
2101 **tcccattaag tgagtttct ttgaatcttc tgctttatct ttaaaaatff gtataattta**  
2161 **tatattttat tctatgtgtt ccatagatat cttaatgtaa aattagtcatt taaaattaca**  
2221 **ctgtcaatta aaagtaatgg gcaagagatt gcatcactact aatttagtaa gaacgttccc**  
2281 **aaatggttga acaatgtgga tcatacatct ctgggtttttt aaatgtattg aggccttctt**  
2341 **ggtggactag tatagtatac ggtcagttat gtcaatgttt catgggtcaat aaaaaggaag**  
2401 **ttgcaattg t**

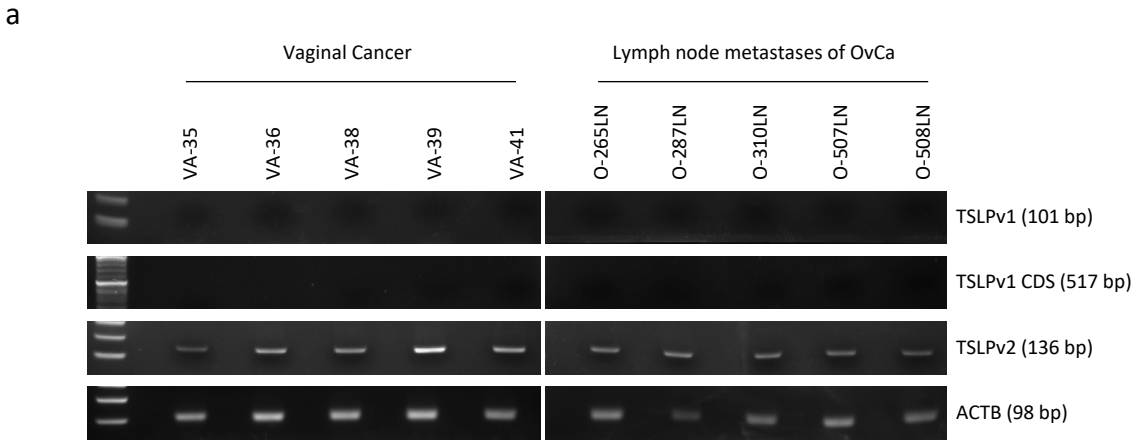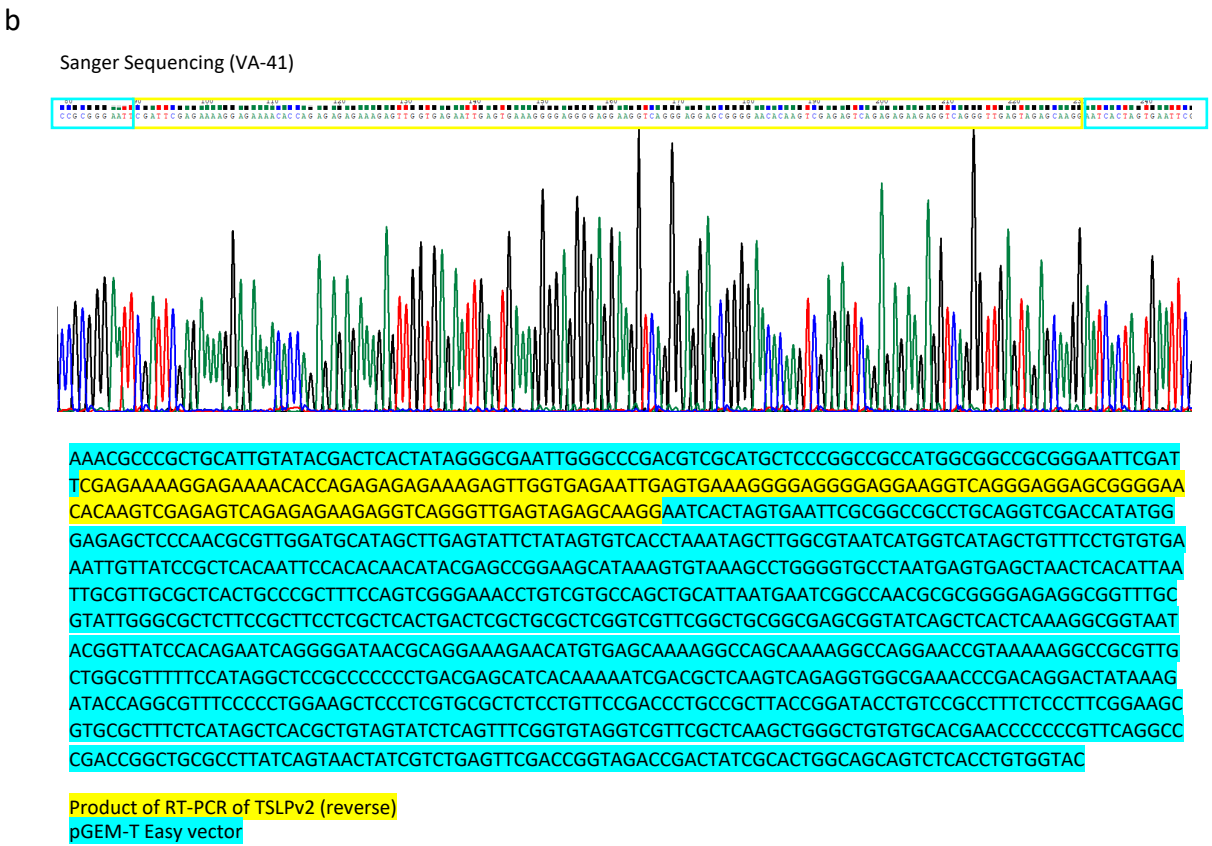

Fig. S3 RT-PCR analysis of TSLPv1 and TSLPv2 in vaginal cancer tissues and lymph node metastases of ovarian cancer. (a) RT-PCR of TSLPv1, CDS of TSLPv1 and TSLPv2 in vaginal cancer tissues and lymph node metastases of ovarian cancer. (b) Sanger Sequencing of RT-PCR product of TSLPv2.



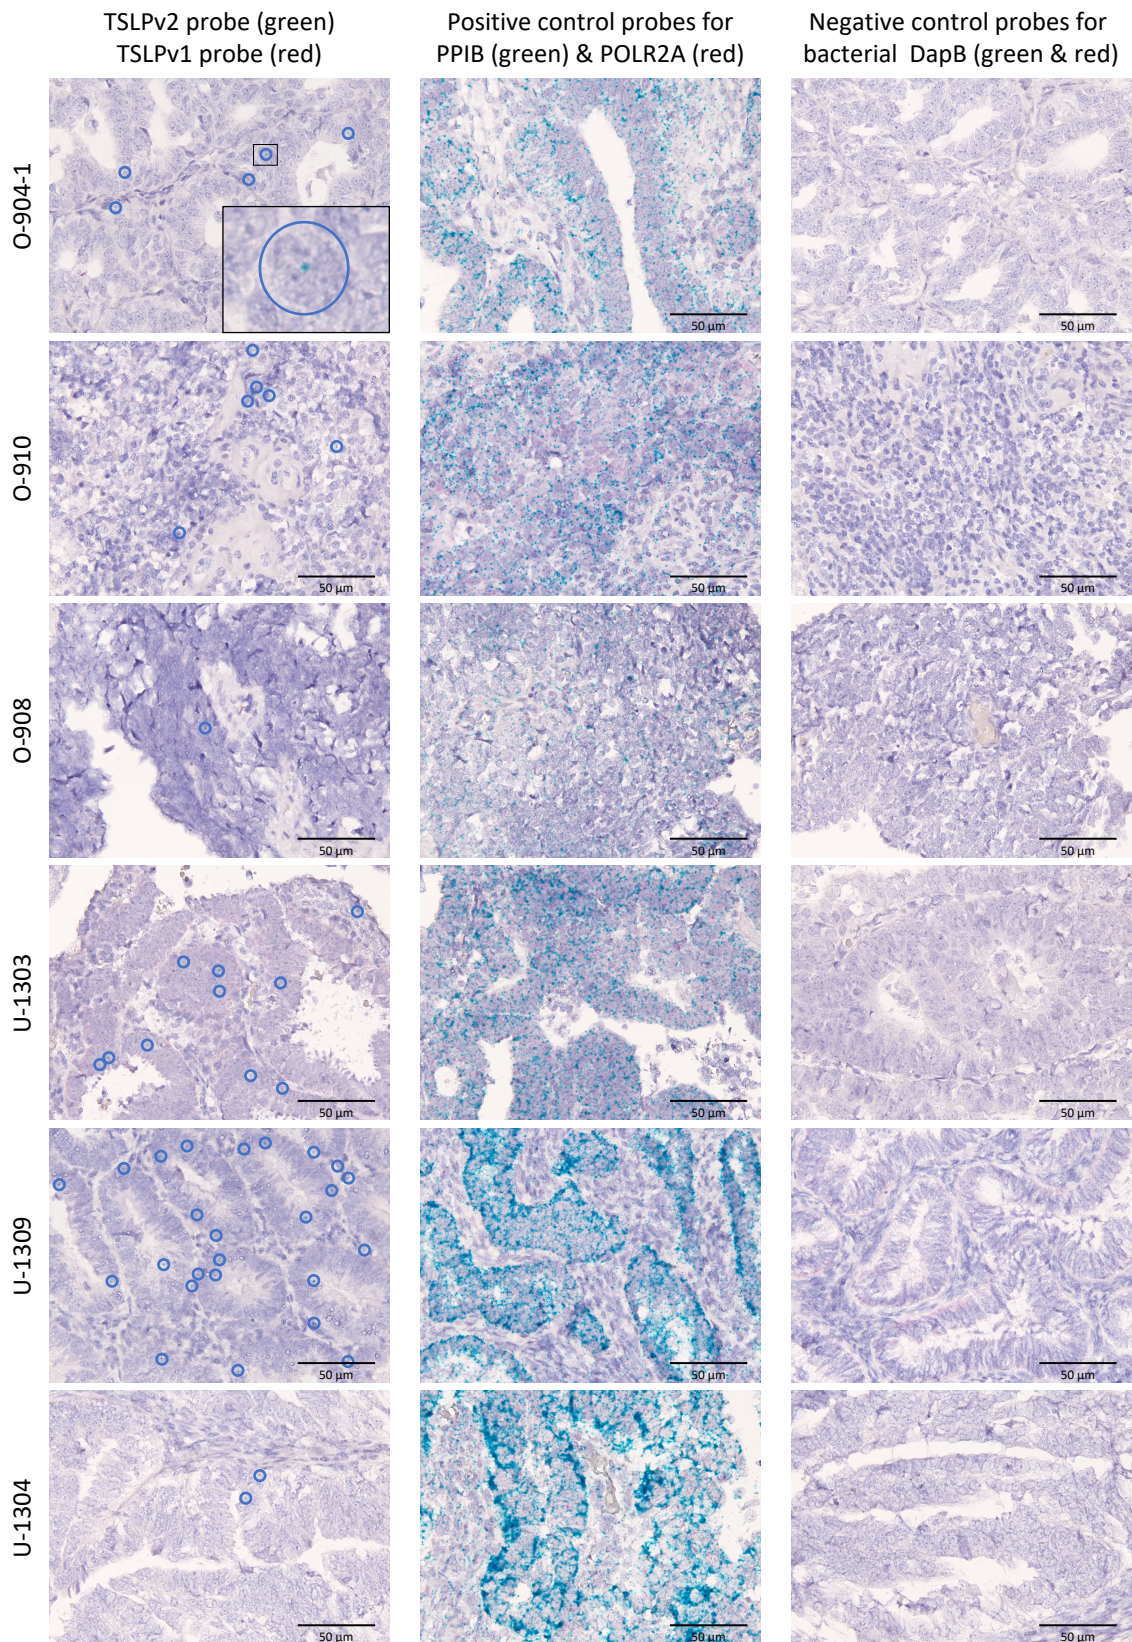

Fig. S4 mRNA expression of *IFTSLP* and *sTSLP* in selected human EOC and EEC tissues was examined by BaseScope duplex RNA in situ hybridization assay. Designed BA-Hs-TSLPv1-2zz-st-C2 (red) targeting TSLPv1 and BA-Hs-TSLPv2-3zz-st-C1 (green) targeting TSLPv2 were applied (left column). Blue circles highlighted positive green signals of TSLPv2-specific probe. An inserted picture showed the high magnification of a positive green signal of *sTSLP* mRNA expression. Positive control probes (for PIPB in green and POLR2A gene in red; middle column) and negative control probes (for bacterial Dab2 gene in green and red; right column) were also applied. 200x magnification; scale bar 50  $\mu$ m.

a

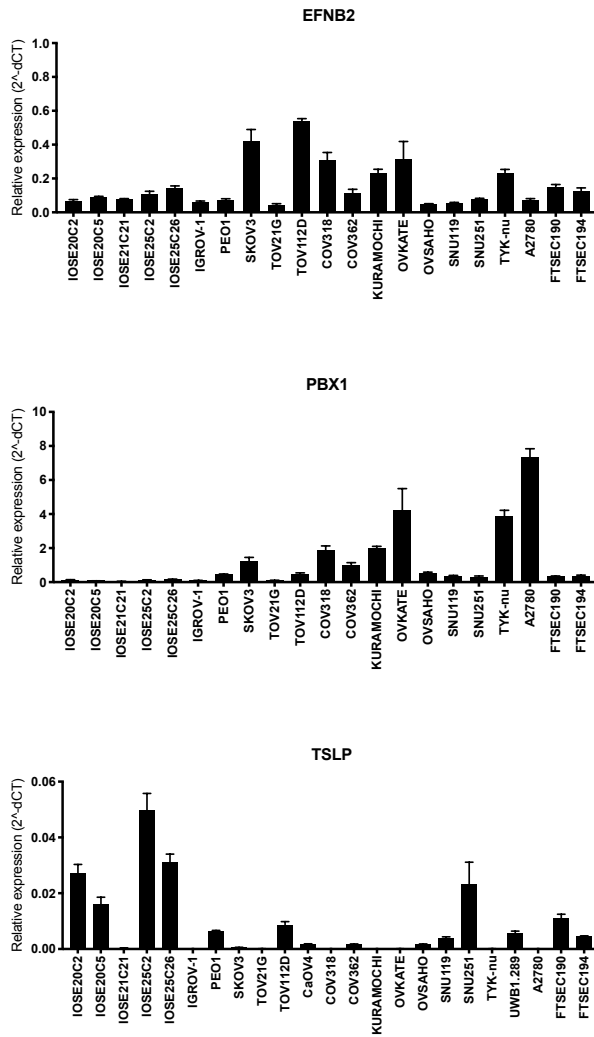

b

XY data: Correlation of TSLP and EFNB2

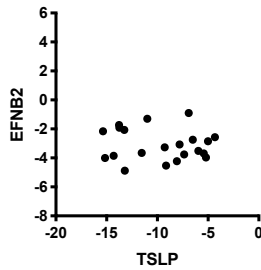

|                               | TSLP vs. EFNB2    |
|-------------------------------|-------------------|
| Spearman r                    |                   |
| r                             | -0.03506          |
| 95% confidence interval       | -0.4705 to 0.4141 |
| P value                       |                   |
| P (two-tailed)                | 0.88              |
| P value summary               | ns                |
| Exact or approximate P value? | Approximate       |
| Significant? (alpha = 0.05)   | No                |
| Number of XY Pairs            | 21                |

XY data: Correlation of TSLP and PBX1

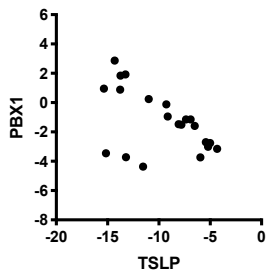

|                               | TSLP vs. PBX1       |
|-------------------------------|---------------------|
| Spearman r                    |                     |
| r                             | -0.5013             |
| 95% confidence interval       | -0.7726 to -0.07527 |
| P value                       |                     |
| P (two-tailed)                | 0.02                |
| P value summary               | *                   |
| Exact or approximate P value? | Approximate         |
| Significant? (alpha = 0.05)   | Yes                 |
| Number of XY Pairs            | 21                  |

Fig. S5 (a) mRNA expression of EFNB2, PBX1 and TSLP in IOSE, FTSEC and human ovarian cancer cell lines were analyzed by qRT-PCR. (b) Associations between TSLP expression and EFNB1 expression, and between TSLP expression and PBX1 expression were analyzed by Spearman's rank correlation.



a

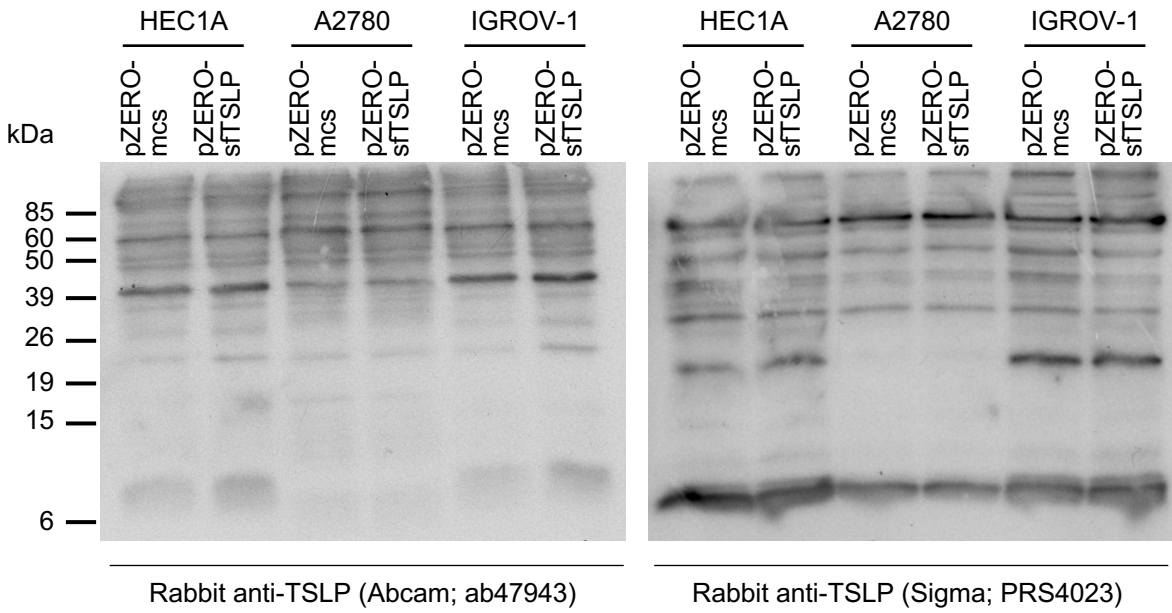

b

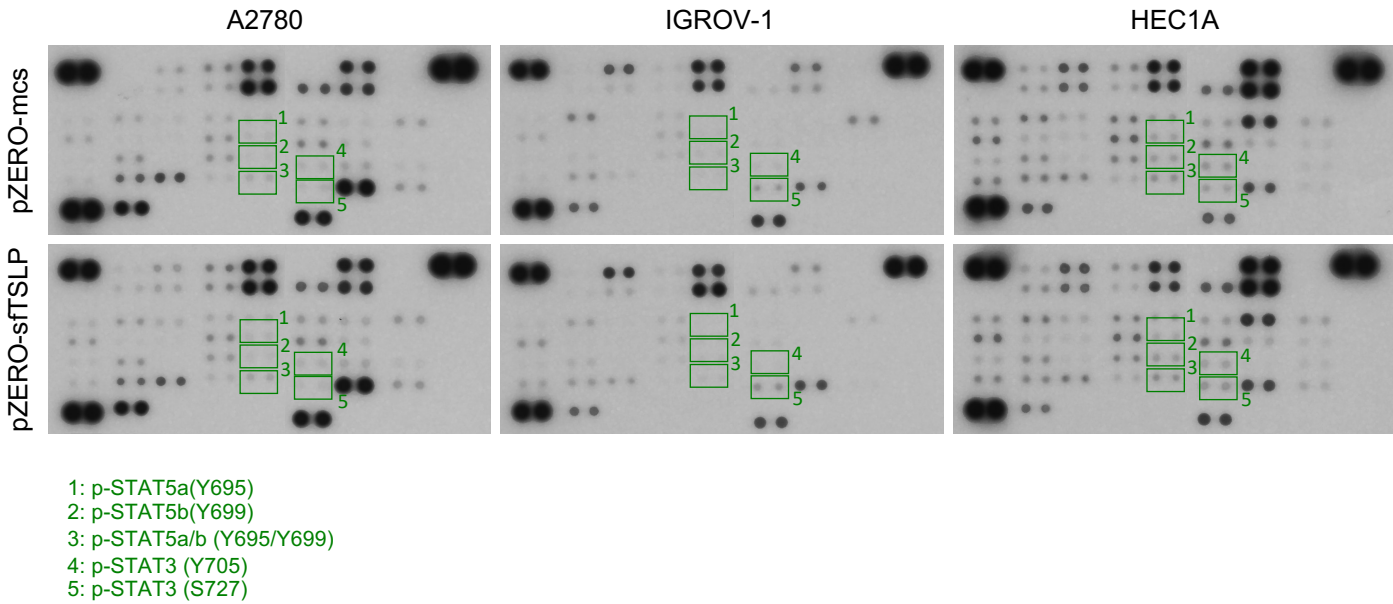

Fig. S6 Western Blotting of TSLP in ovarian (A2780 and IGROV-1)/endometrial (HEC1A) cancer cells with or without sfTSLP overexpression using two polyclonal antibodies. (b) Human Phospho-Kinase Array was performed in human ovarian (A2780 and IGROV-1) and endometrial (HEC1A) cancer cells with or with sfTSLP overexpression.

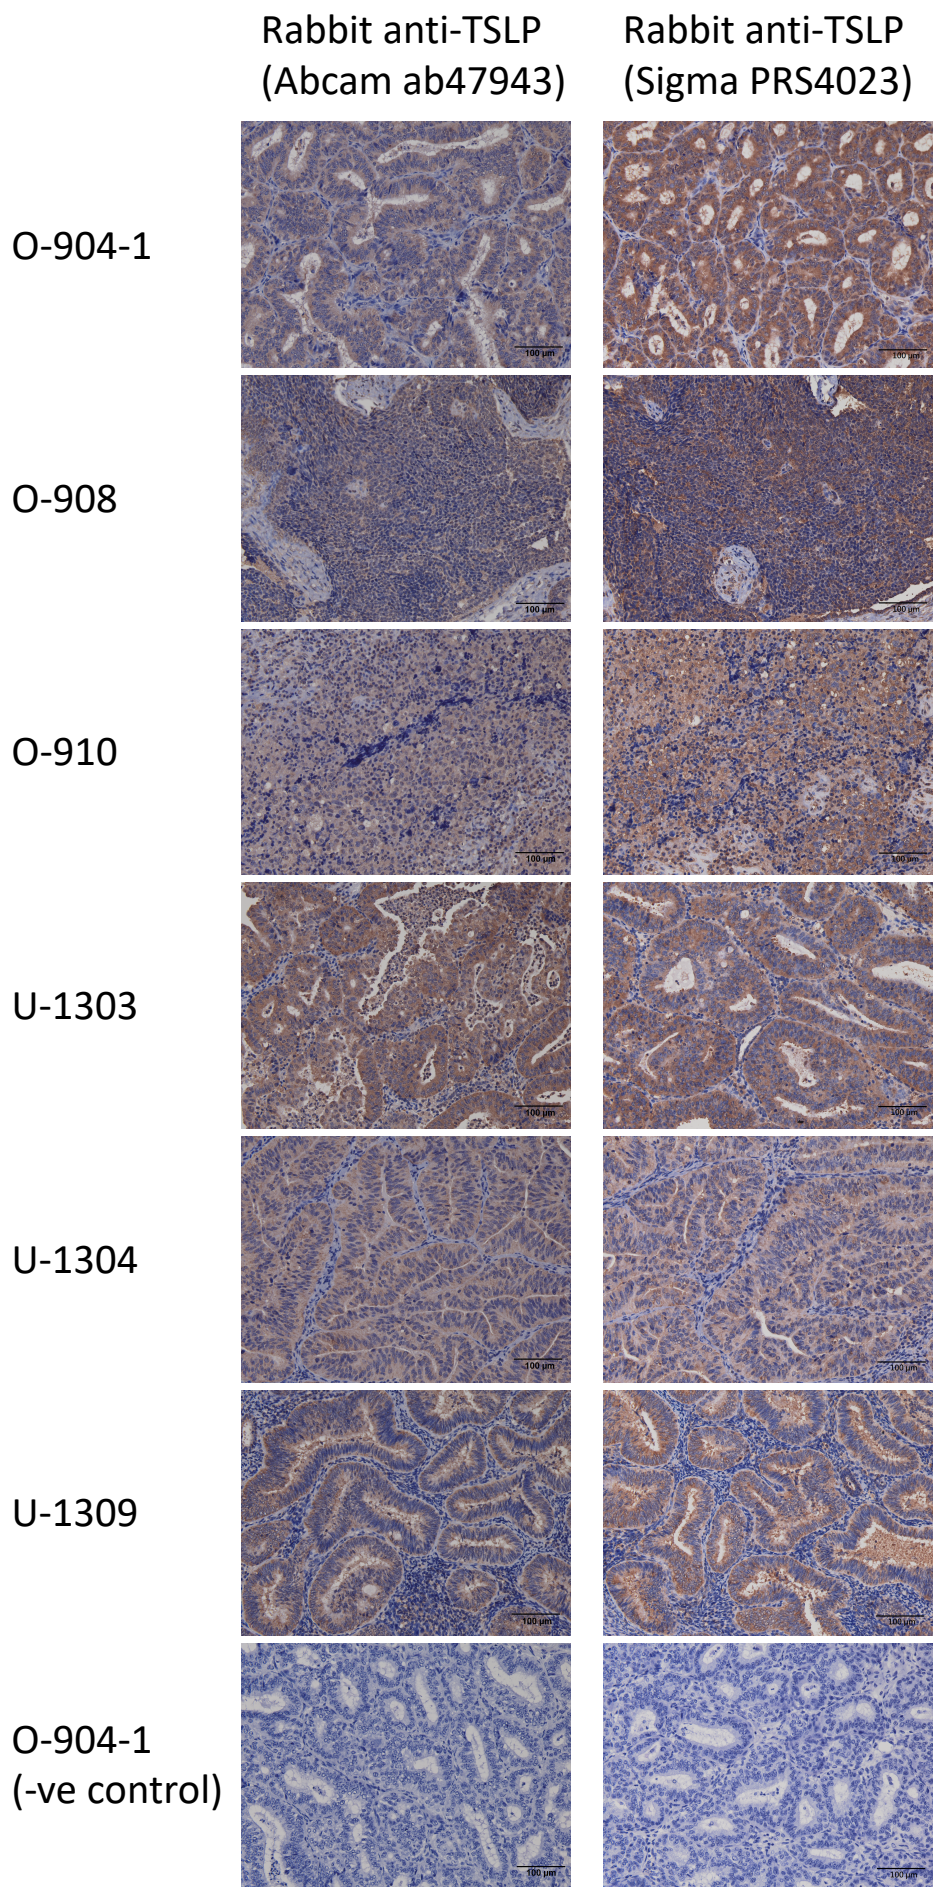

Fig. S7 Protein expression of TSLP in selected human EOC and EEC tissues was examined by immunohistochemistry using two polyclonal antibodies.



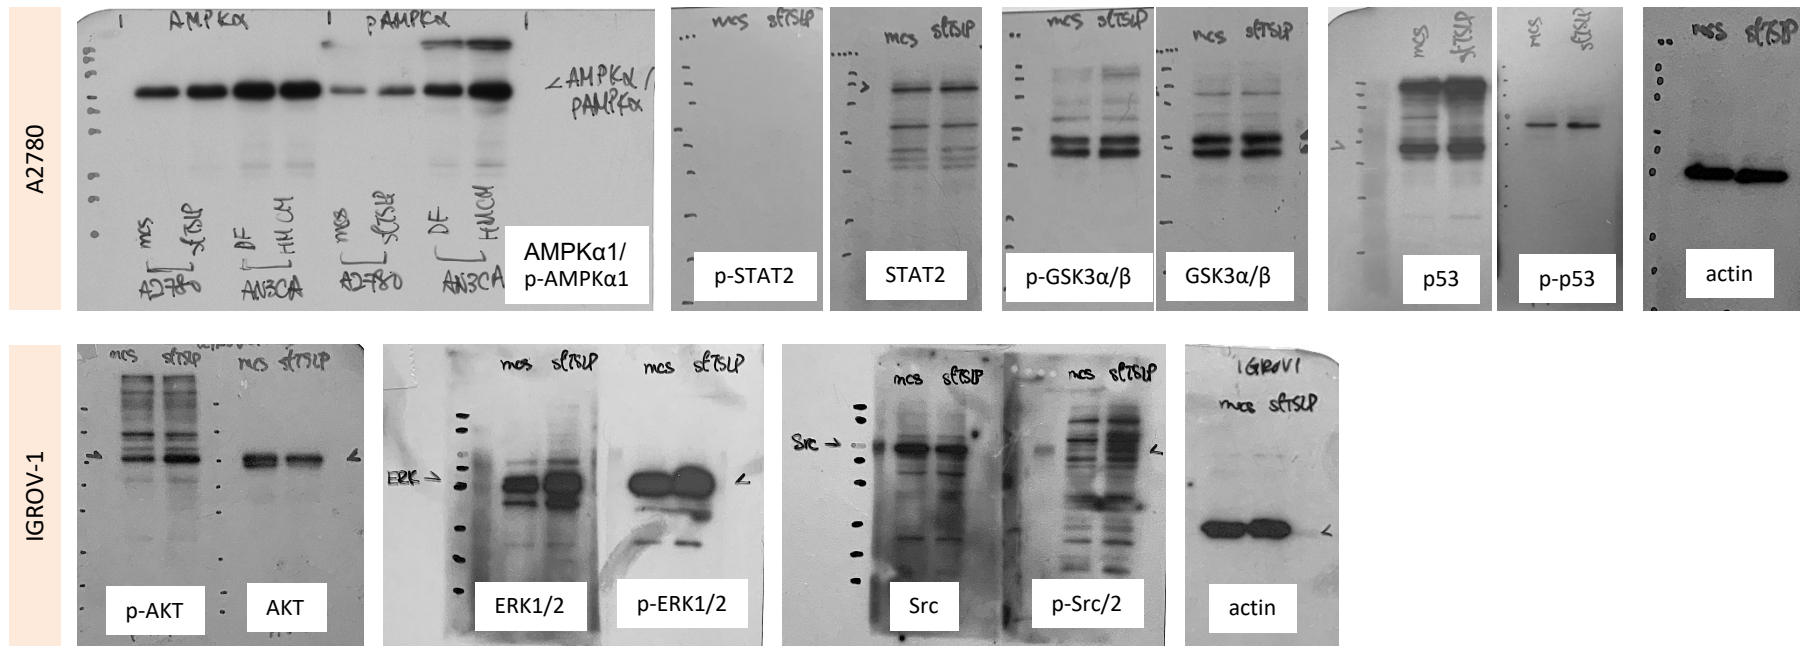

Fig. S8 The whole Western blots showing all bands and molecular weight markers.
